# Supplementary material for: String ball-like SnS2/ZnTe heterostructures with improved bifunctional photo/electrocatalytic activity towards overall water splitting
Source: Royal Society of Chemistry journal article supplement (doi:10.1039/d3nj04353c), 2024-01-01
Supplement: d3nj04353c1.pdf [file d3nj04353c1.pdf]

## Sting ball-like heterostructures of SnS<sub>2</sub>/ZnTe with improved bifunctional photo/electrocatalytic activity towards Overall Water Splitting

Muhammad Awais<sup>a</sup>, Sidra Aslam<sup>a</sup>, Muhammad Naeem Ashiq<sup>b</sup>, Misbah Mirza<sup>c</sup>  
Muhammad Safdar<sup>a</sup>

<sup>a</sup> Institute of Chemistry, Khwaja Fareed UEIT, Rahim Yar Khan, Pakistan

<sup>b</sup> Bahauddin Zakariya University, Multan, Pakistan

<sup>c</sup> The Women University, Multan, Pakistan

\*Corresponding author

E-mail address: [msafdarsami@yahoo.com](mailto:msafdarsami@yahoo.com) (Muhammad Safdar)

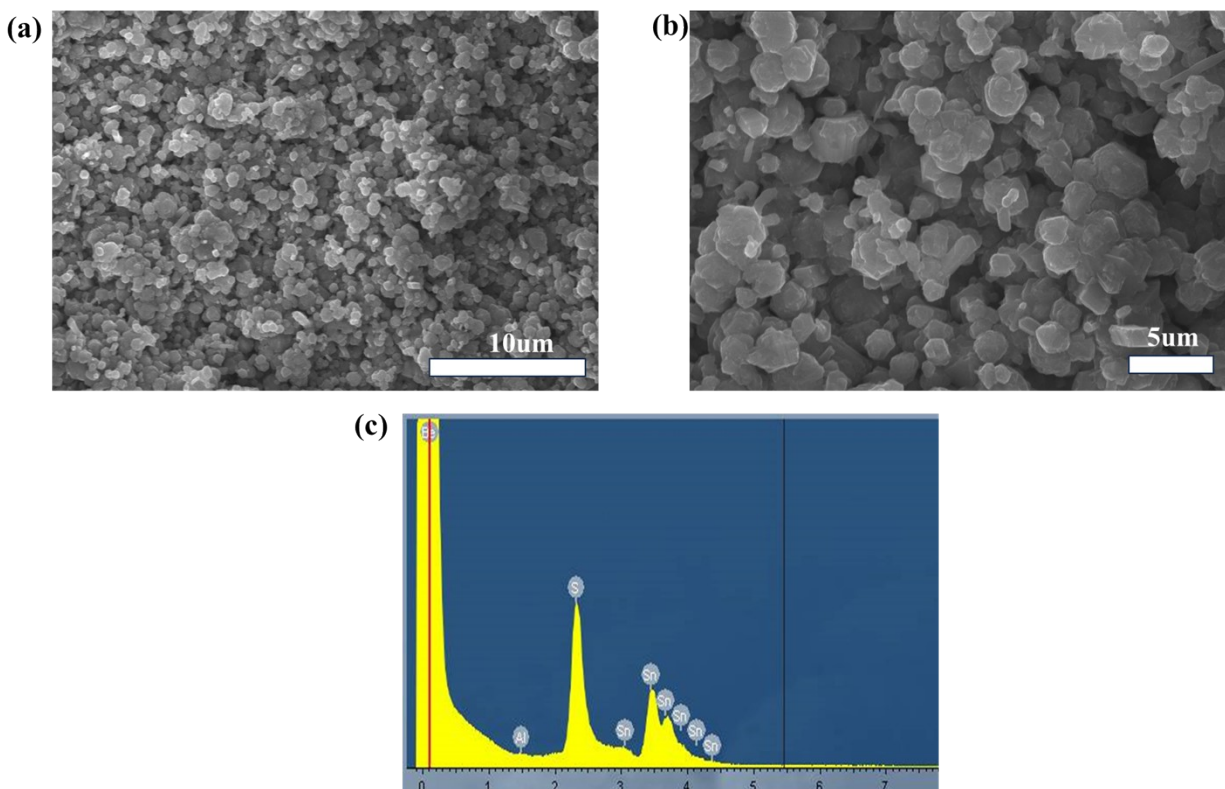

Figure S1. (a-b) Sem image of SnS<sub>2</sub> (b) EDX spectra of SnS<sub>2</sub>

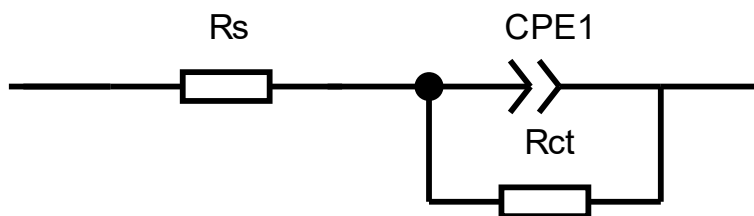

Figure S2. Circuit diagram

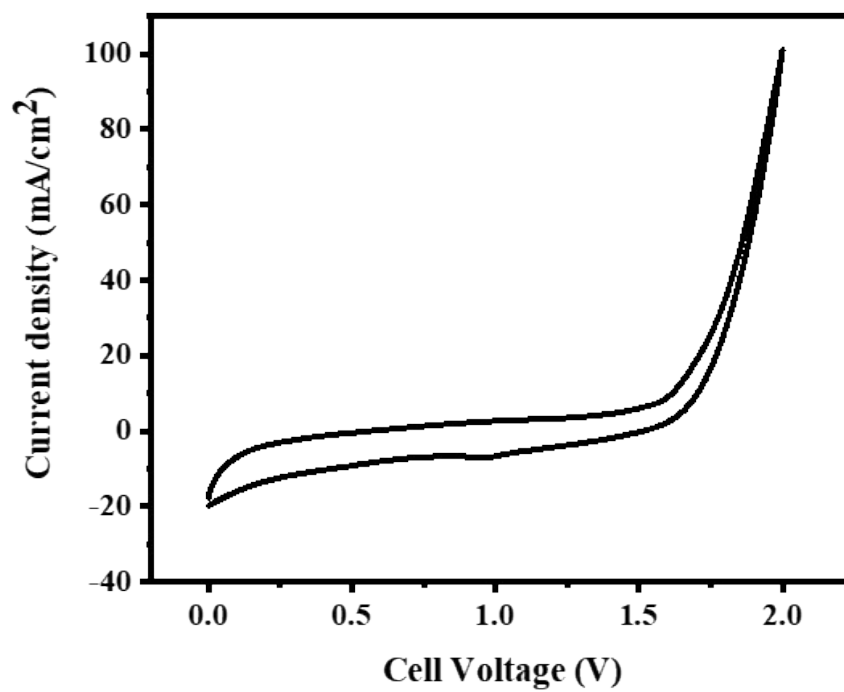

Figure S3: Overall water-splitting CV

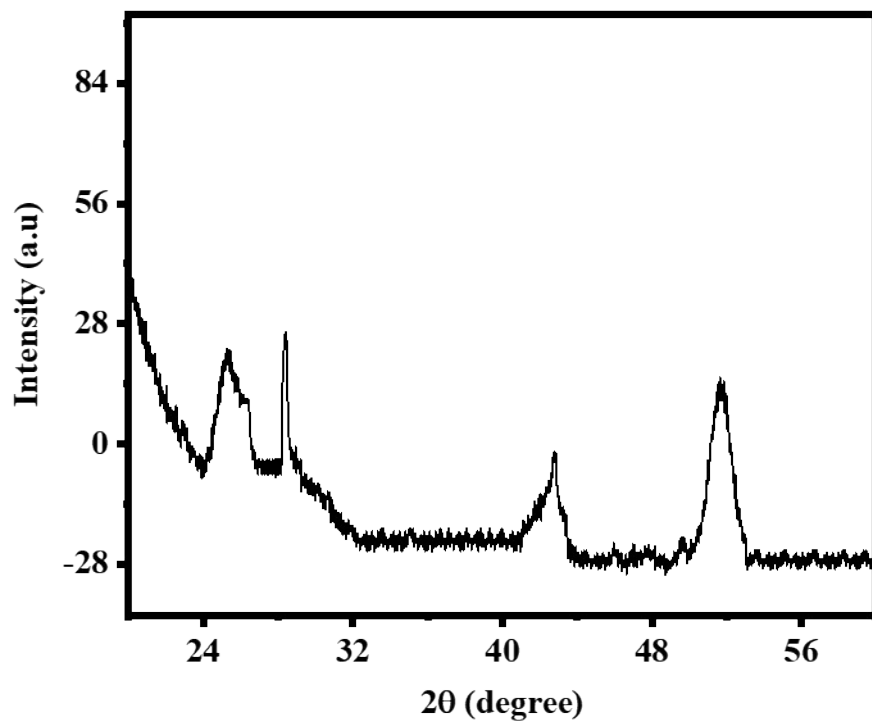

Figure S4: XRD pattern of SnS<sub>2</sub>/ZnTe after OER and HER study

Table S1. Comparison table for OER

| Sr.No | Sample Name                        | Over Potential (mV) | Tafel Slop (mV/dec) | Ref                 |
|-------|------------------------------------|---------------------|---------------------|---------------------|
| 1     | CuS/SnS <sub>2</sub> /rGO          | 264                 | 47                  | [1]                 |
| 2     | TiO <sub>2</sub> /SnS <sub>2</sub> | 570                 | 107                 | [2]                 |
| 3     | C@SnS <sub>2</sub> /SnS            | 380                 | 63                  | [3]                 |
| 4     | Co-doped SnS <sub>2</sub>          | 281                 | 62                  | [4]                 |
| 5     | NiFe-SnS <sub>2</sub> / CC-3       | 251                 | 41                  | [5]                 |
| 6     | SnS <sub>2</sub> /ZnTe             | 105                 | 47                  | <b>Present work</b> |

Table S2. Comparison table for HER.

| Sr No. | Sample Name                              | Over Potential (mV) | Tafel Slop (mV/dec) | Ref.         |
|--------|------------------------------------------|---------------------|---------------------|--------------|
| 1      | MoS <sub>2</sub> /SnS <sub>2</sub>       | 288                 | 50                  | [6]          |
| 2      | SnS <sub>2</sub> /SnO <sub>2</sub>       | 108                 | 50                  | [7]          |
| 3      | MoSe <sub>2</sub> /SnS <sub>2</sub> -1.5 | 285                 | 109                 | [8]          |
| 4      | MoS <sub>2</sub> NPs/SnS <sub>2</sub> NS | 249                 | 42                  | [9]          |
| 5      | SnS <sub>2</sub> /ZnTe                   | 231                 | 80                  | Present work |

## References

1. Yao, S., et al., *Coupling SnS<sub>2</sub> and rGO aerogel to CuS for enhanced light-assisted OER electrocatalysis*. 2021. **50**(16): p. 5530-5539.
2. Li, M., et al., *Synergistic effect of the valence bond environment and exposed crystal facets of the TiO<sub>2</sub>/SnS<sub>2</sub> heterojunction for achieving enhanced electrocatalytic oxygen evolution*. 2018. **6**(8): p. 3488-3499.
3. Jiang, M., et al., *Hollow C@ SnS<sub>2</sub>/SnS nanocomposites: high efficient oxygen evolution reaction catalysts*. 2021. **583**: p. 149-156.
4. Jiang, M., et al., *Co-doped SnS<sub>2</sub> nanosheet array for efficient oxygen evolution reaction electrocatalyst*. 2019. **54**: p. 13715-13723.
5. Deng, K., et al., *Synergistic Coupling of SnS<sub>2</sub> Nanosheet Arrays with Ni/Fe Dual Metal and Ru Nanodots via a Cation Exchange Strategy for Overall Water Splitting*. 2021. **61**(1): p. 382-391.
6. Xiao, X., et al., *Preparation of the flower-like MoS<sub>2</sub>/SnS<sub>2</sub> heterojunction as an efficient electrocatalyst for hydrogen evolution reaction*. 2020. **487**: p. 110890.
7. Wu, J., et al., *Exposing highly active (100) facet on a SnS<sub>2</sub>/SnO<sub>2</sub> electrocatalyst to boost efficient hydrogen evolution*. 2021. **292**: p. 120200.
8. Chen, Y., et al., *Electrocatalytically inactive SnS<sub>2</sub> promotes water adsorption/dissociation on molybdenum dichalcogenides for accelerated alkaline hydrogen evolution*. 2019. **64**: p. 103918.
9. Hu, L., et al., *MoS<sub>2</sub> nanoparticles coupled to SnS<sub>2</sub> nanosheets: The structural and electronic modulation for synergetic electrocatalytic hydrogen evolution*. 2018. **366**: p. 8-15.
